# Supplementary material for: Identification of Potential Candidate Genes of Oral Cancer in Response to Chronic Infection With Porphyromonas gingivalis Using Bioinformatical Analyses
Source: PubMed Central journal article supplement (PMC6394248; doi:10.3389/fonc.2019.00091), 2019-02-21
Supplement: Image_1.pdf [file Image_1.pdf]

## Supplementary Material

# Identification of Potential Candidate Genes of Oral Cancer in Response to Chronic Infection with *Porphyromonas gingivalis* by Using Bioinformatical Analyses

Fengxue Geng<sup>1</sup> (co-first author), Qingxuan Wang<sup>2</sup> (co-first author), Chen Li<sup>1</sup>, Junchao Liu<sup>1</sup>, Dongmei Zhang<sup>1</sup>, Shuwei Zhang<sup>1</sup>, Yaping Pan<sup>1\*</sup>

\* Correspondence: Yaping Pan: [yppan@cmu.edu.cn](mailto:yppan@cmu.edu.cn)

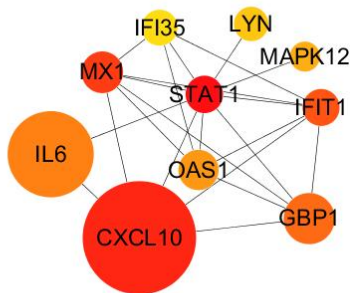

| Rank | Node   |
|------|--------|
| 1    | STAT1  |
| 2    | CXCL10 |
| 3    | MX1    |
| 4    | IFIT1  |
| 5    | GBP1   |
| 6    | IL6    |
| 7    | OAS1   |
| 8    | MAPK12 |
| 9    | LYN    |
| 10   | IFI35  |

Supplementary Figure 1

The hub genes were calculated and ranked with cytoHubba (Radiality).
